# Supplementary material
Source: PubMed Central journal article supplement (PMC3376854)
Supplement: emmm0004-0269-SD1.pdf [file emmm0004-0269-SD1.pdf]

## Supplemental Information:

### **Calcineurin/NFAT signaling inhibits myeloid hematopoiesis.**

Jan Fric, Clarice X.F. Lim, Esther G.L. Koh, Benjamin Hofmann, Jinmiao Chen, Tay Hock Soon, Siti Aminah Bte Mohammad Isa, Alessandra Mortellaro, Christiane Ruedl, Paola Ricciardi-Castagnoli

### **Table of contents:**

**Figure S1:** NFAT1 expression and translocation in HSC lines.

**Figure S2:** Total numbers of myeloid cells in spleen and BM of mice reconstituted with control or calcineurin/NFAT impaired HSC.

**Figure S3:** Expression of VIVIT peptide inhibits IL-2 up-regulation induced in DCs by LPS or curdlan.

**Figure S4:** Preferential growth advantage of myeloid cells impaired in calcineurin/NFAT signaling.

**Figure S5:** Analysis of differentially expressed genes in Flt3-L cultures of BM cells treated with NFAT inhibitor Cyclosporin A. Clustering of differentially expressed genes and function analysis using Ingenuity Pathway Analysis platform.

### **Supplemental methods:**

- **Array hybridization and analysis**
- **Immunofluorescent labeling**
- **qPCR primers**
- **Flow cytometry antibodies**

## Supplemental Figures:

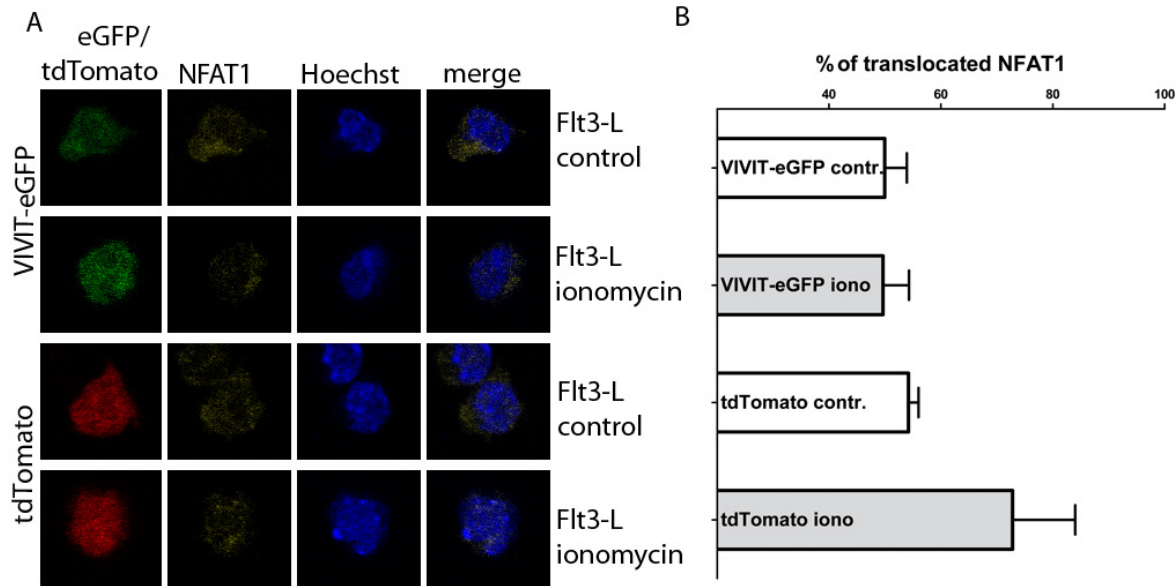

**Figure S 1A, B: NFAT1 expression and translocation in HSC lines.** Confocal images of VIVIT-eGFP and control-tdTomato expressing HSC lines stimulated for 48h with Flt3-L. NFAT translocation was induced by treatment with ionomycin for 2h (original magnification, x200). Intensity of NFAT signals from confocal images as quantified for Figure 1D and S1A using TissueQuest software and used to calculate the percentage of NFAT located in the nucleus

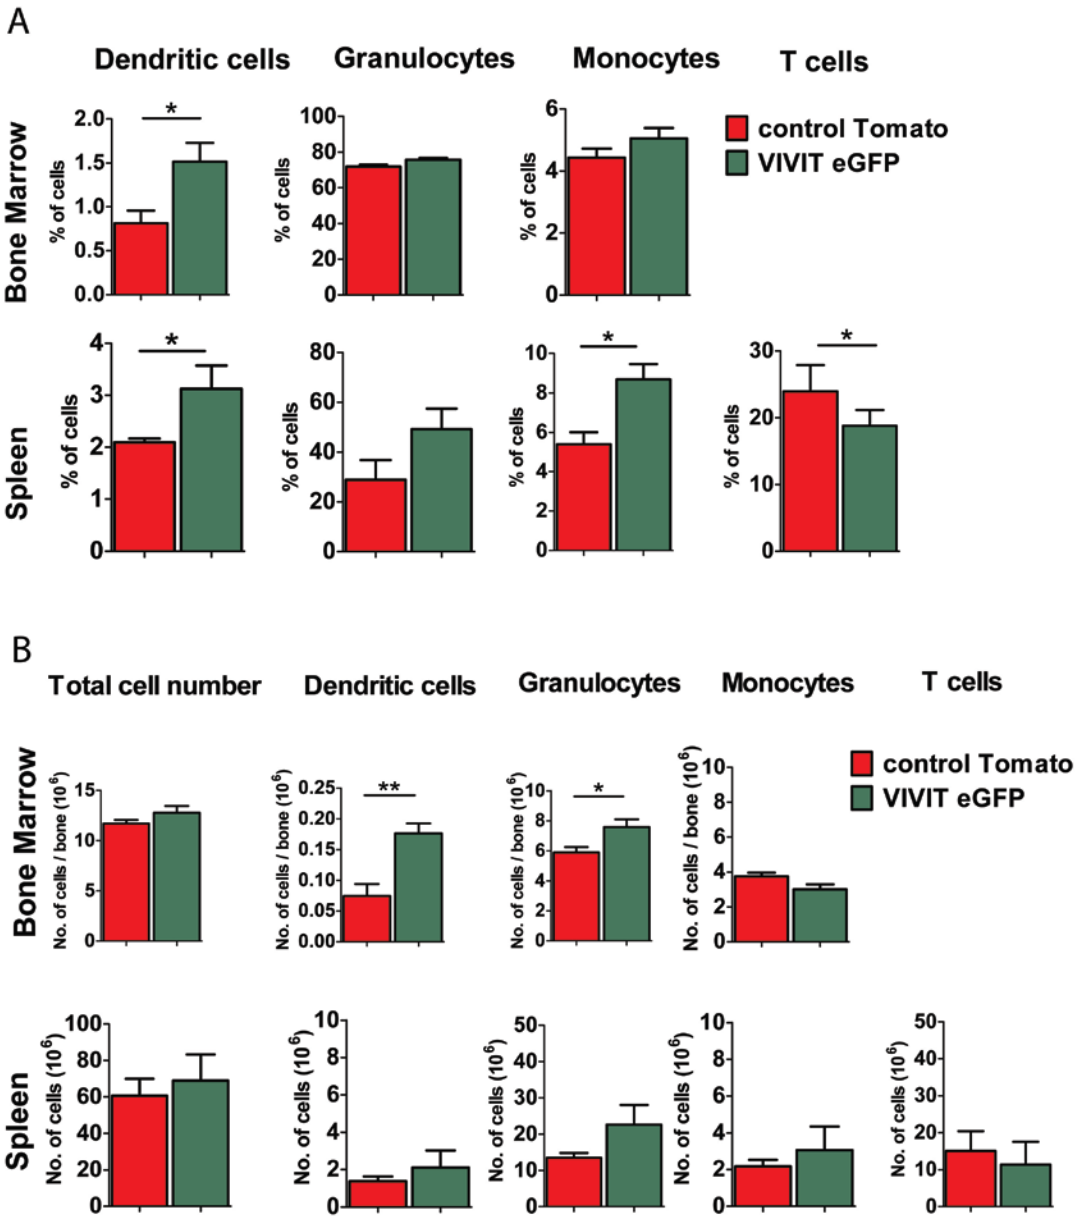

**Figure S2A,B: Calcineurin/NFAT inhibition in HSC increase the numbers of cells in myeloid pool.** Host mice were lethally irradiated and rescued by intravenous injection of HSC. HSC populations comprised cells expressing either VIVIT or a control plasmid with a fluorescent tag, mice were analyzed 8 weeks after engraftment. The percentage (S2A) or total numbers (S2B) of DC (CD11c<sup>+</sup>MHCII<sup>+</sup>), granulocytes (CD11b<sup>+</sup>Gr-1<sup>+</sup>), monocytes (CD11b<sup>+</sup>Gr1<sup>-</sup>) and T cells (CD3<sup>+</sup>) in BM (upper panel) and spleen (lower panel) is shown.

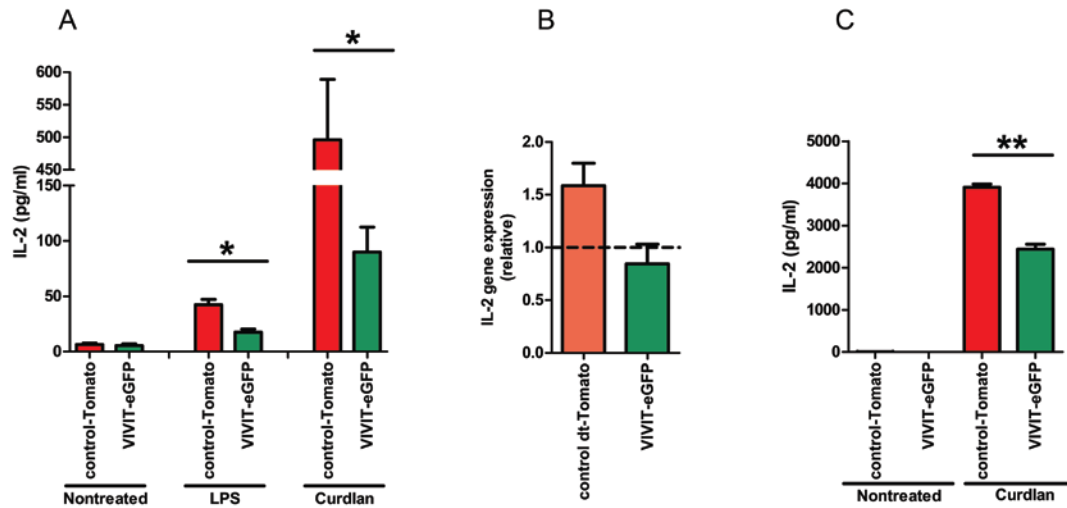

**Figure S3: Expression of VIVIT peptide inhibits IL-2 up-regulation induced in DCs by LPS or curdlan.** (A) IL-2 protein concentration and (B) mRNA levels were determined 24h (protein) and 4h (mRNA) after LPS or curdlan stimulation of splenic CD11c<sup>+</sup> cells. CD11c<sup>+</sup> cells were isolated from spleens 8 weeks after mouse reconstitution with VIVIT-eGFP or control-tdTomato HSC. (C) IL-2 protein expression determined 24 h after curdlan stimulation of DCs derived from VIVIT-eGFP and tdTomato expressing HSC lines in Flt3-L supplemented medium.

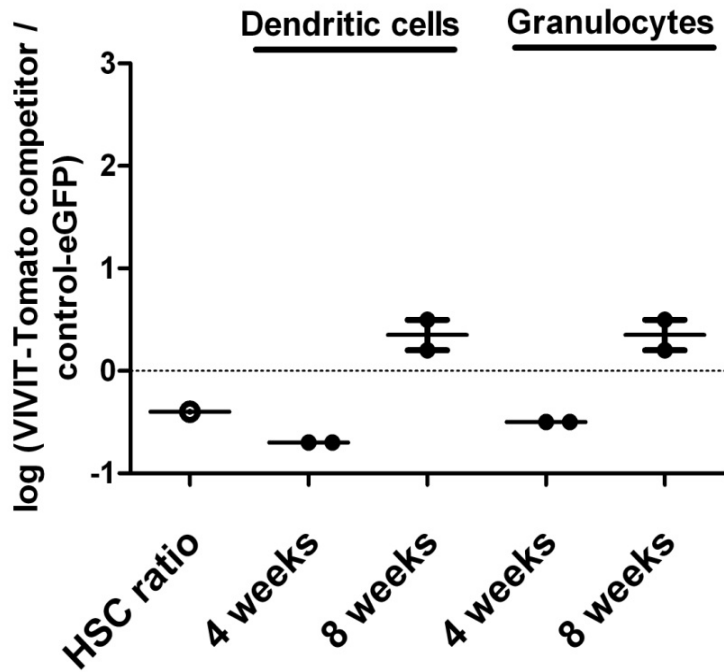

**Figure S4: Preferential growth advantage of myeloid cells impaired in calcineurin/NFAT signaling.** Flow cytometric analysis of DCs (CD11c<sup>+</sup>MHCII<sup>+</sup>) and granulocytes (CD11b<sup>+</sup>Gr-1<sup>+</sup>) in the bone marrow of mice reconstituted with VIVIT-tdTomato and control eGFP expressing HSC lines. Lethally irradiated mice were reconstituted with the mixture of HSC in the competitive ratio of 30% VIVIT-tdTomato to 70% of control eGFP HSC lines. Bone marrow cells were analyzed 4 and 8 weeks after the transplantation. Data are representative of two independent experiments.

A

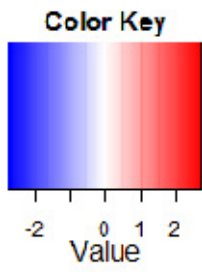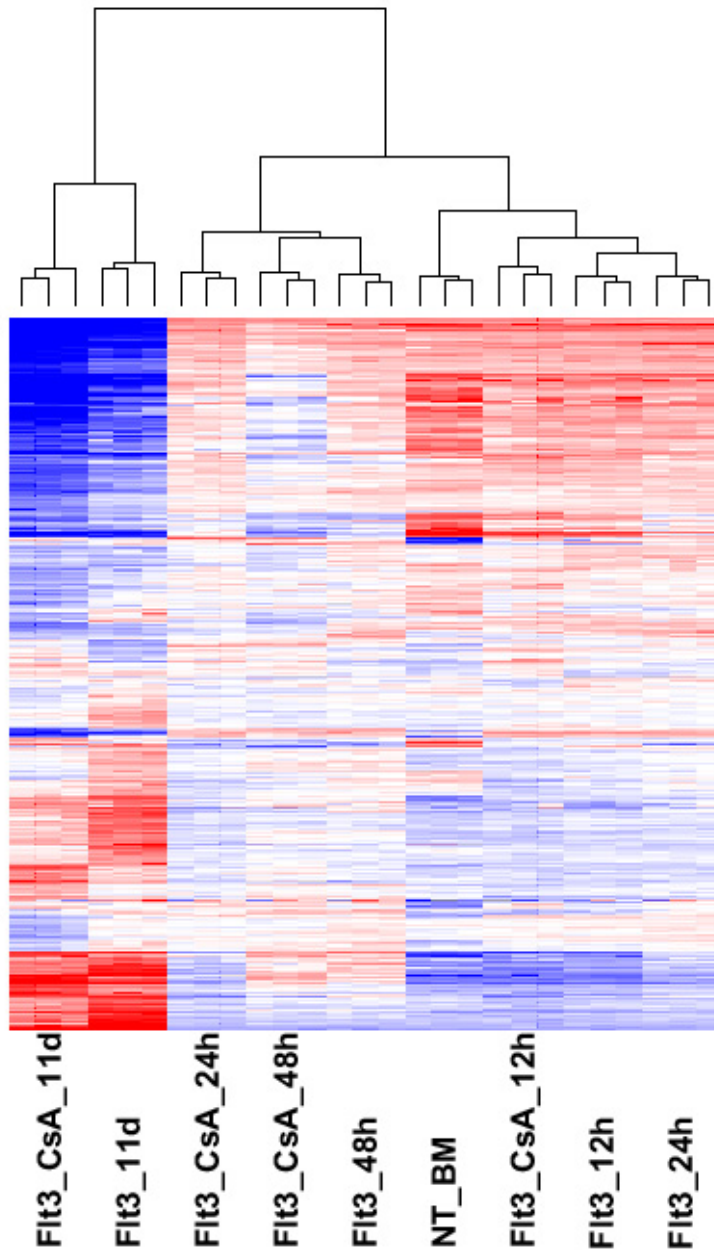

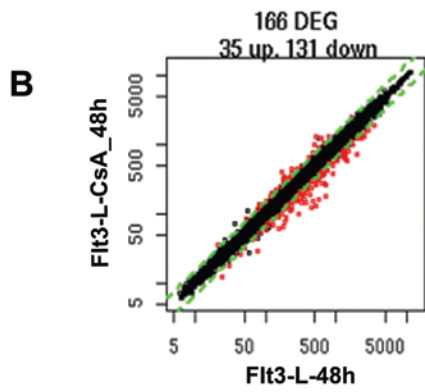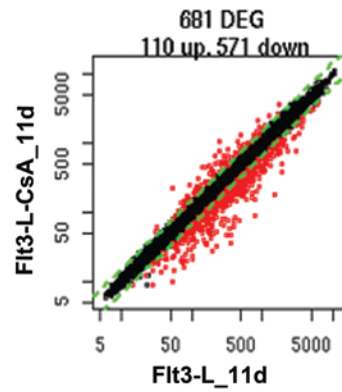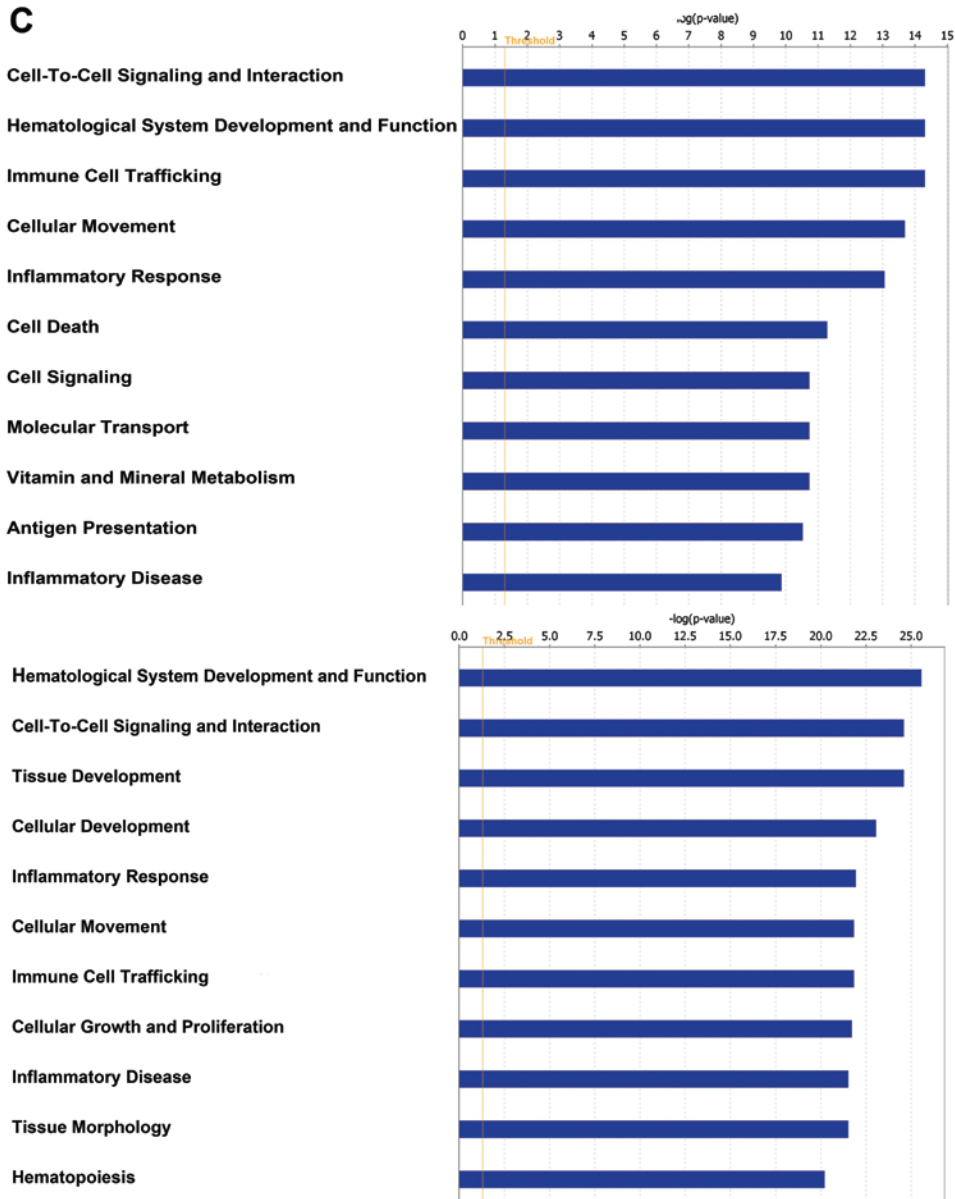

**Figure S5: Analysis of differentially expressed genes in Flt3-L cultures of BM cells treated with NFAT inhibitor Cyclosporin A.** (A) Clustering of gene expression during BM-DCs differentiation in Flt3-L supplemented medium in the presence or absence of CsA. (B, C) Analysis of differentially expressed genes. (B) Number of differentially expressed genes in Flt3-L supplemented bone marrow cultures treated with CsA versus controls (48h left and 11 days right). (C) Function analysis of differentially expressed genes 48 h (upper panel) and 11days (lower panel) using Ingenuity Pathway Analysis platform. Graphs display most significant cellular functions form 166 (upper panel) and 681 (lower panel) differentially expressed genes. Data represent 3 biological replicates for each culture condition.



## Supplemental methods:

### Array hybridization and analysis

Total RNA was extracted following the double extraction protocol: RNA isolation by acid guanidinium thiocyanate-phenol-chloroform extraction (Trizol Invitrogen) followed by a Qiagen RNeasy clean-up procedure. RNA purity was assessed by spectrophotometer (Nanodrop): 260/280 and 260/230 ratios were evaluated. If the 260/280 and 260/230 ratios are < of 1.8, RNA samples are ethanol precipitated. Total RNA integrity was assessed by Agilent Bioanalyzer and the RNA Integrity Number (RIN) was calculated and RIN greater than 9, were used for microarray analysis. ssDNA was prepared, fragmented and labelled according to the Affymetrix protocol. Fragmented ssDNAs were hybridized to the standard arrays for 17h at 45°C; the arrays were then washed and stained using the fluidics station and then scanned using GeneChip Scanner 3000. The images were analyzed using Command Console and comparison analyses were carried out according to the instructions provided by Affymetrix.

Microarray data handling was mainly done with an R package AMDA (Pelizzola et al, 2006) and Bioconductor 2.6 (Gentleman et al, 2004). The Robust Multichip Average (RMA) (Irizarry et al, 2003) method was employed to calculate probe set intensity. To filter out noisy data before the selection of differentially expressed genes a filter based on Interquartile Range (IQR) was applied. All the probe sets whose IQR value is lower than 0.15 were eliminated from the data set. The identification of differentially expressed genes (DEGs) was addressed using linear modeling and empirical Bayes methods (Smyth, 2004) together with Benjamini-Hochberg false discovery rate correction of the p value. The comparison between CsA treated and control Flt3-L-derived DCs was performed selecting DEGs with a threshold p value of 0.05 and fold change of 1.5. The list of differentially expressed genes and proteins was input into the Ingenuity Pathway Analysis (IPA) platform for the identification of biological processes as well as canonical pathways comparing CsA treated and control Flt3-L derived DCs. All microarray data files are available for free download at the Gene Expression Omnibus (GEO accession number: GSE29094; <http://www.ncbi.nlm.nih.gov/geo>).

Gentleman RC, Carey VJ, Bates DM, Bolstad B, Dettling M, Dudoit S, Ellis B, Gautier L, Ge Y, Gentry J et al (2004) Bioconductor: open software development for computational biology and bioinformatics. *Genome biology* 5: R80

Irizarry RA, Bolstad BM, Collin F, Cope LM, Hobbs B, Speed TP (2003) Summaries of Affymetrix GeneChip probe level data. *Nucleic acids research* 31: e15

Pelizzola M, Pavelka N, Foti M, Ricciardi-Castagnoli P (2006) AMDA: an R package for the automated microarray data analysis. *BMC bioinformatics* 7: 335

Smyth GK (2004) Linear models and empirical bayes methods for assessing differential expression in microarray experiments. *Statistical applications in genetics and molecular biology* 3: Article3

## Immunofluorescent labeling

Cells were cultured for 48h in Flt3-L supplemented medium, followed by stimulation with ionomycin (500 ng/ml) for 2h. Cells were fixed for 20min at room temperature in 4% paraformaldehyde, collected, washed twice in PBS, permeabilized in 0.5% Triton X100 for 2 minutes at room temperature, washed and then blocked for 1h with 3% BSA. Cells were incubated for 1h (37°C) with anti-NFAT1 antibody (Thermo Scientific) diluted to 10 µg/ml in the blocking solution, washed 3 times in PBS and incubated for 1h (37°C) with the secondary antibody (AlexaFluor 633 goat anti-mouse IgG, Molecular Probes) at 1 µg/ml, and Hoechst at 2 µg/ml. Cells were mounted in FluorSave (Calbiochem). Cellular localization of NFAT1 was analyzed using an Olympus FV1000 confocal microscope. Intensity of NFAT signals from confocal images were quantified using TissueQuest software (TissueGnostics, Austria) and used to calculate the percentage of NFAT located in the nucleus.

## qPCR primers

| Gene   | Primer  | Sequence (5'- 3')        |
|--------|---------|--------------------------|
| NFATc1 | Forward | TGCAAGCCAAATTCCTGGTGG    |
|        | Reverse | GGGGTCGGGAGGCATGGTGA     |
| NFATc2 | Forward | CTGGTCTACGGGGGCCAGCA     |
|        | Reverse | GGCAGGGACTGGGTGGTAGG     |
| IL-2   | Forward | CCCAGGATGCTCACCTTC       |
|        | Reverse | CAACAGTTACTCTGATATTGCTGA |
| cdk4   | Forward | TTGTGCAGGTAGGAGTGCTG     |
|        | Reverse | TGCCAGAGATGGAGGAGTCT     |
| ccna2  | Forward | GTGGTGATTCAAACTGCCA      |
|        | Reverse | AGAGTGTGAAGATGCCCTGG     |
| ccnb2  | Forward | CAGAGAAAGCTTGGCAGAGG     |
|        | Reverse | TGAAACCAAGTGCAGATGGAG    |
| E2f4   | Forward | AGCTCATGCACTCTCTCGTG     |
|        | Reverse | TACCTCCTTTGAGCCCATCA     |
| GAPDH  | Forward | TCGTCCGTAGACAAAATGG      |
|        | Reverse | TTGAGGTCAATGAAGGGGTC     |
| p21    | Forward | ATCACCAGGATTGGACATGG     |
|        | Reverse | CGGTGTCAGAGTCTAGGGGA     |
| NFia   | TaqMan  | Mm00447981_m1            |
| Etv1   | TaqMan  | Mm00514804_m1            |
| Nupr1  | TaqMan  | Mm00498104_m1            |
| Atf5   | TaqMan  | Mm00459515_m             |

## Flow cytometry antibodies

| Antibody        | Conjugated                          | Clone       | Company        |
|-----------------|-------------------------------------|-------------|----------------|
| CD3e            | Biotin, APC                         | 145-2C11    | BD Biosciences |
| CD4             | Pacific Blue                        | RM4-5       | Biolegend      |
| CD8a            | APC-Cy7                             | 53-6.7      | Biolegend      |
| CD11c           | APC, eFluor450                      | N418        | ebioscience    |
| CD11b           | Biotin, APC-eFluor780, FITC         | M1/70       | ebioscience    |
| CD45R (B220)    | Biotin, PE-Cy7                      | RA3-6B2     | ebioscience    |
| CD19            | Biotin, PE                          | eBio1D3     | ebioscience    |
| I-A/I-E         | APC-eFluor780, Alexa Fluor700       | M5/114.15.2 | ebioscience    |
| Gr-1            | Biotin, AlexaFluor700, Pacific Blue | RB6-8C5     | Biolegend      |
| F4/80           | APC-Cy7, PE-Cy7                     | Cl:A3-1     | Biolegend      |
| NK1.1           | Biotin                              | PK136       | BD Biosciences |
| TER119          | Biotin                              | TER-119     | ebioscience    |
| CD127 (IL-7Ra)  | Biotin                              | A7R34       | ebioscience    |
| CD135           | APC                                 | A2F10       | ebioscience    |
| Ly-6A/E (Sca-1) | Pacific Blue                        | E13-161.7   | Biolegend      |
| CD117 (c-kit)   | PE-Cy7                              | 2B8         | Biolegend      |
| Siglec-H        | PE                                  | eBio440c    | eBioscience    |
| PDCA-1          | Pe-Cy7                              | eBio927     | eBioscience    |
